# Supplementary material
Source: publisher figshare collection journal article supplement (https://acs.figshare.com/ndownloader/files/3733303)
Supplement: Supplementary file 1 [file 3733303]

## Supporting information

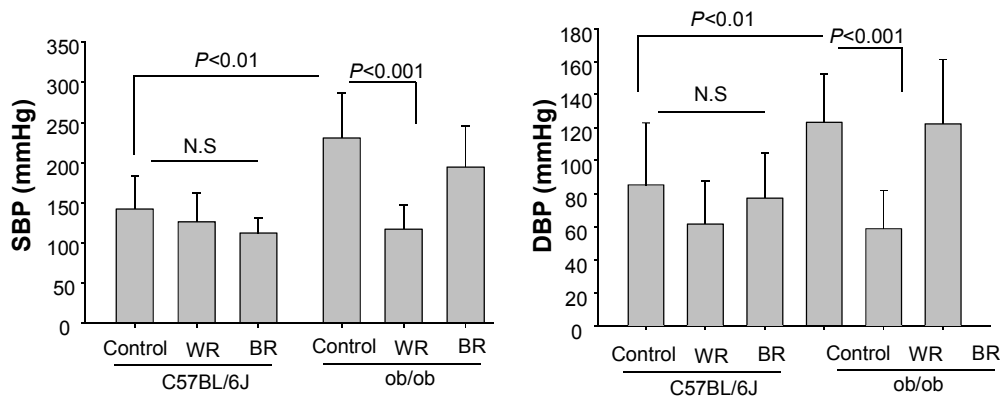

In the final week of animal feeding period, blood pressure was determined by non-invasive tail cuff method. Mice were pre-warmed and stabilized, and then systolic blood pressure and diastolic blood pressure were monitored. Data are expressed as the mean  $\pm$  SD value (n=6).
